# Supplementary material for: Effect Biomarkers of the Widespread Antimicrobial Triclosan in a Marine Model Diatom
Source: MDPI journal article supplement (doi:10.3390/antiox11081442), 2022-07-25
Supplement: s1 [file s1]

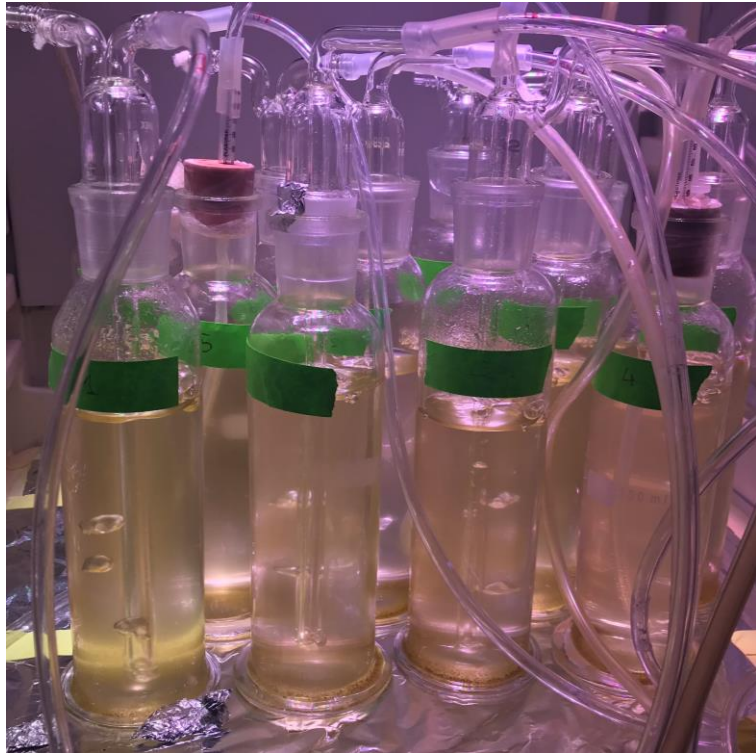

**Supplementary Figure S1.** Overview of the *Phaeodactylum tricorneratum* cultivation units within the growth chamber.

A

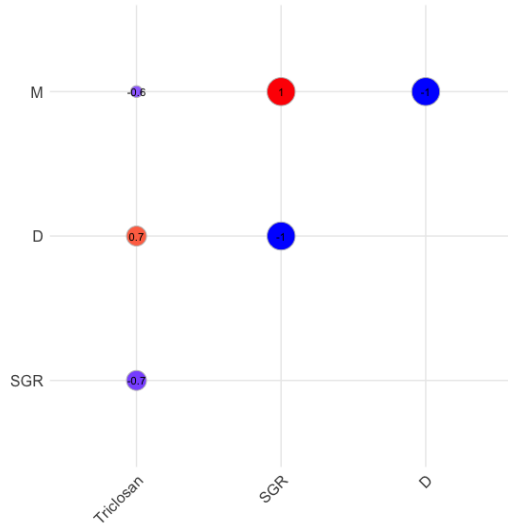

B

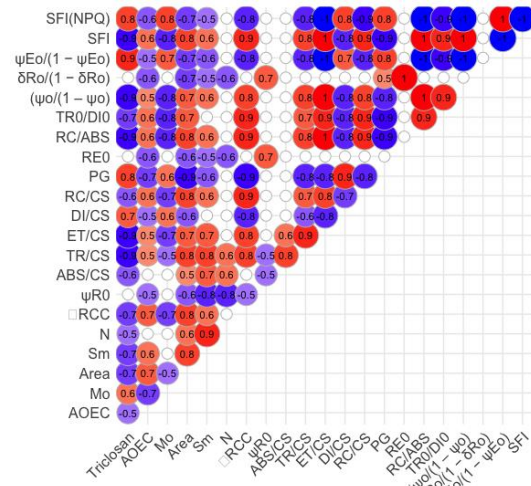

C

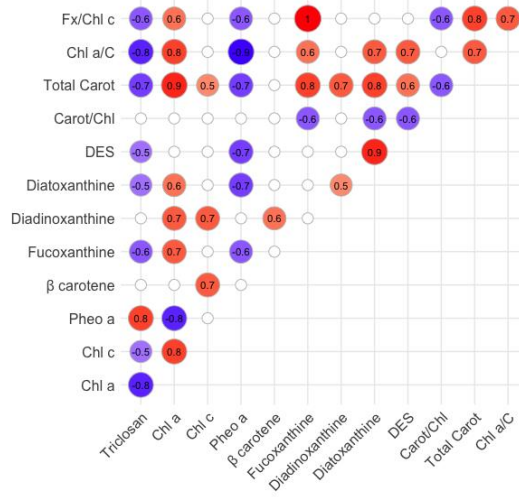

D

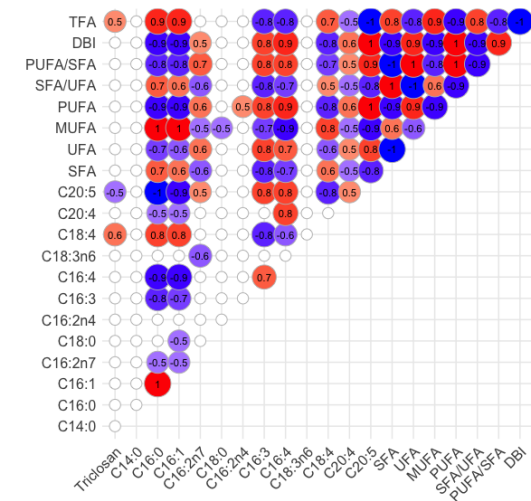

E

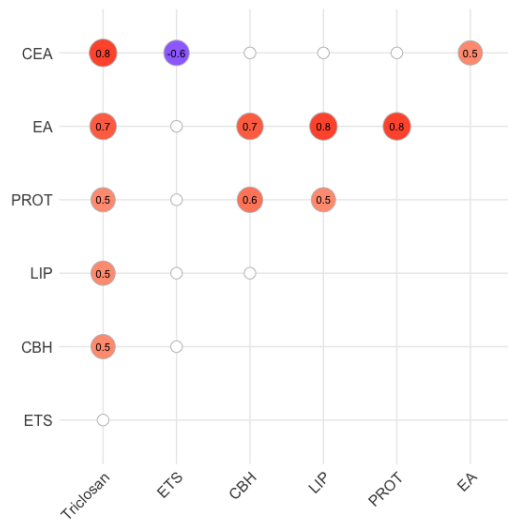

F

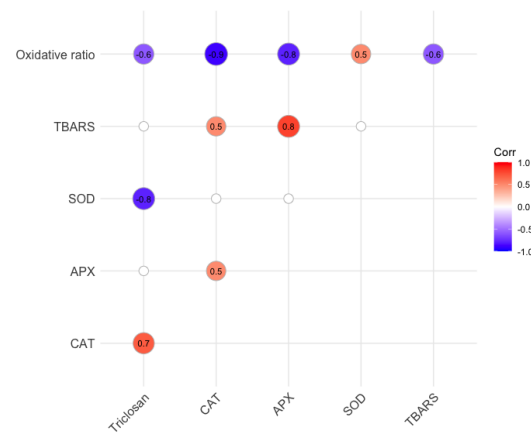

**Supplementary Figure S2.** Spearman correlogram between *Phaeodactylum tricornutum* growth, photochemical, pigment, fatty acid, energetic and oxidative stress traits and the exogenous triclosan concentration applied (only significant correlations at  $p < 0.05$  are shown; N = 3 per treatment).
